# Supplementary material for: Yamogenin-Induced Cell Cycle Arrest, Oxidative Stress, and Apoptosis in Human Ovarian Cancer Cell Line
Source: MDPI journal article supplement (doi:10.3390/molecules27238181), 2022-11-24
Supplement: s1 [file s1]

**Table S1.** The tested genes from the TaqMan Array Human Apoptosis Fast 96 well plates.

| Gene symbol |              |              |             |           |           |          |          |          |          |         |          |
|-------------|--------------|--------------|-------------|-----------|-----------|----------|----------|----------|----------|---------|----------|
| 18S (ctrl)  | GAPDH (ctrl) | HPRT1 (ctrl) | GUSB (ctrl) | BIRC2     | APAF1     | BAD      | BAK1     | BAX      | BBC3     | BCAP31  | BCL10    |
| BCL2        | BCL2A1       | BCL2L1       | BCL2L10     | BCL2L11   | BCL2L13   | BCL2L14  | BCL2L2   | BCL3     | BID      | BIK     | NAIP     |
| BIRC3       | XIAP         | BIRC5,EPR1   | BIRC6       | BIRC7     | BIRC8     | BNIP3    | BNIP3L   | BOK      | NOD2     | NOD1    | CARD6    |
| CARD9       | CASP1        | CASP10       | CASP14      | CASP2     | CASP3     | CASP4    | CASP5    | CASP6    | CASP7    | CASP8   | CASP8AP2 |
| CASP9       | CFLAR        | CHUK         | CRADD       | DAPK1     | DEDD      | DEDD2    | DIABLO   | IFT57    | FADD     | FAS     | FASLG    |
| HIP1        | HRK          | HTRA2        | CARD18      | IKBKB     | IKBKE     | IKBKG    | LRDD     | LTA      | LTB      | MCL1    | NLRP1    |
| NFKB1       | NFKB2        | NFKBIA       | NFKBIB      | NFKBIE    | NFKBIZ    | PEA15    | PMAIP1   | PYCARD   | REL      | RELA    | RELB     |
| RIPK1       | RIPK2        | TBK1         | TNF         | TNFRSF10A | TNFRSF10B | TNFRSF1A | TNFRSF1B | TNFRSF21 | TNFRSF25 | TNFSF10 | TRADD    |
